# Supplementary material for: INsPECT, an Open-Source and Versatile Software for Automated Quantification of (Leishmania) Intracellular Parasites
Source: PubMed Central journal article supplement (PMC4022486; doi:10.1371/journal.pntd.0002850), 2014-05-15

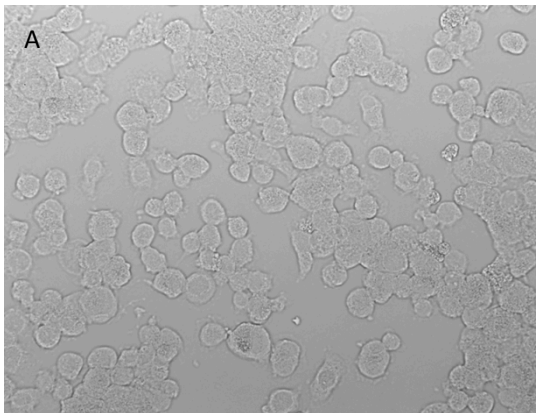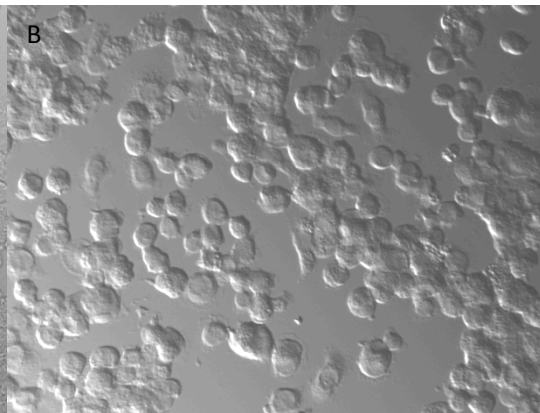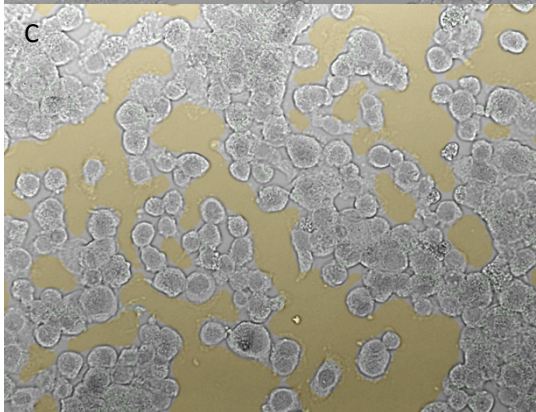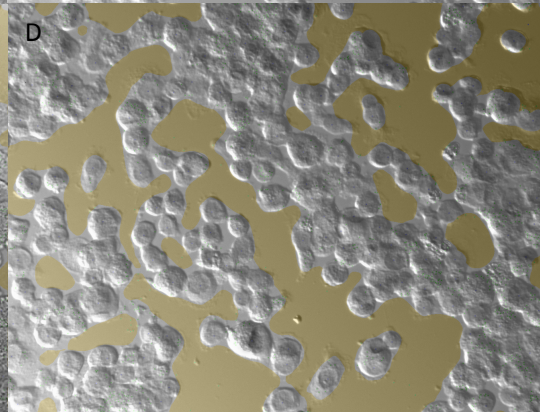

Supplement: pntd.0002850.s001.pdf [file pntd.0002850.s001.pdf]
